# Supplementary material for: Genome-wide association studies for corneal and refractive astigmatism in UK Biobank demonstrate a shared role for myopia susceptibility loci
Source: PubMed Central journal article supplement (PMC6267700; doi:10.1007/s00439-018-1942-8), 2018-10-10
Supplement: 439_2018_1942_MOESM1_ESM.pdf [file 439_2018_1942_MOESM1_ESM.pdf]

## SUPPLEMENTARY MATERIALS

### Genome-wide association studies for corneal and refractive astigmatism in UK Biobank demonstrate a shared role for myopia susceptibility loci

*Rupal L. Shah, Jeremy A. Guggenheim, UK Biobank Eye and Vision Consortium*

| Online Resource | Title                                                                                                                                                                                                   | Page |
|-----------------|---------------------------------------------------------------------------------------------------------------------------------------------------------------------------------------------------------|------|
| 1               | Corneal astigmatism and refractive astigmatism as a function of age in the analysed UK Biobank sample.                                                                                                  | S2   |
| 2               | Estimates of SNP-heritability ( $h^2_{\text{SNP}}$ ) for corneal astigmatism, refractive astigmatism and spherical equivalent.                                                                          | S3   |
| 3               | Partitioning trait variance into additive, dominance and environmental components using GREMLd.                                                                                                         | S4   |
| 4               | Summary of GWAS undertaken.                                                                                                                                                                             | S4   |
| 5               | Conditional analyses performed using summary statistics and conditioning on lead marker – for genome-wide significant associated loci from Corneal Astigmatism GWAS.                                    | S5   |
| 6               | Conditional analyses performed using summary statistics and conditioning on lead marker – for genome-wide significant associated loci from Refractive Astigmatism GWAS.                                 | S5   |
| 7               | The 10 markers demonstrating strongest association in GWAS for Corneal Astigmatism analysed as a continuous trait with PLINK 2.0.                                                                       | S6   |
| 8               | The 10 markers demonstrating strongest association in GWAS for Corneal Astigmatism analysed as a dichotomous trait (cases $\geq 1.00D$ ) with PLINK 2.0.                                                | S6   |
| 9               | The 10 markers demonstrating strongest association in GWAS for Refractive Astigmatism analysed as a continuous trait with PLINK 2.0.                                                                    | S7   |
| 10              | The 10 markers demonstrating strongest association in GWAS for Refractive Astigmatism analysed as a dichotomous trait (cases $\geq 1.00D$ ) with PLINK 2.0.                                             | S7   |
| 11              | Manhattan plots for GWAS of Corneal and Refractive Astigmatism using PLINK 2.0 as continuous and dichotomous (cases $\geq 1.00D$ ) traits.                                                              | S8   |
| 12              | Quantile-Quantile plots from GWAS of Corneal and Refractive Astigmatism using PLINK 2.0 as continuous and dichotomous (cases $\geq 1.00D$ ) traits.                                                     | S9   |
| 13              | Tests for a difference in genetic effect size in male vs. female participants for the genome-wide significant loci for corneal astigmatism analysed as a continuous trait in unrelated participants.    | S10  |
| 14              | Tests for a difference in genetic effect size in male vs. female participants for the genome-wide significant loci for refractive astigmatism analysed as a continuous trait in unrelated participants. | S10  |
| 15              | The 10 genes demonstrating strongest association from the MAGMA gene-based association test for Corneal Astigmatism as a continuous trait.                                                              | S11  |
| 16              | The 10 genes demonstrating strongest association from the MAGMA gene-based association test for Refractive Astigmatism as a continuous trait.                                                           | S12  |

**Online Resource 1. Corneal astigmatism and refractive astigmatism as a function of age in the analysed UK Biobank sample.** The width of “violins” corresponds to the distribution of the trait, weighted by the sample size of the age category relative to the full sample. The solid black circle indicates the median and the white rectangle indicates the 25<sup>th</sup> to 75<sup>th</sup> percentile of the data.

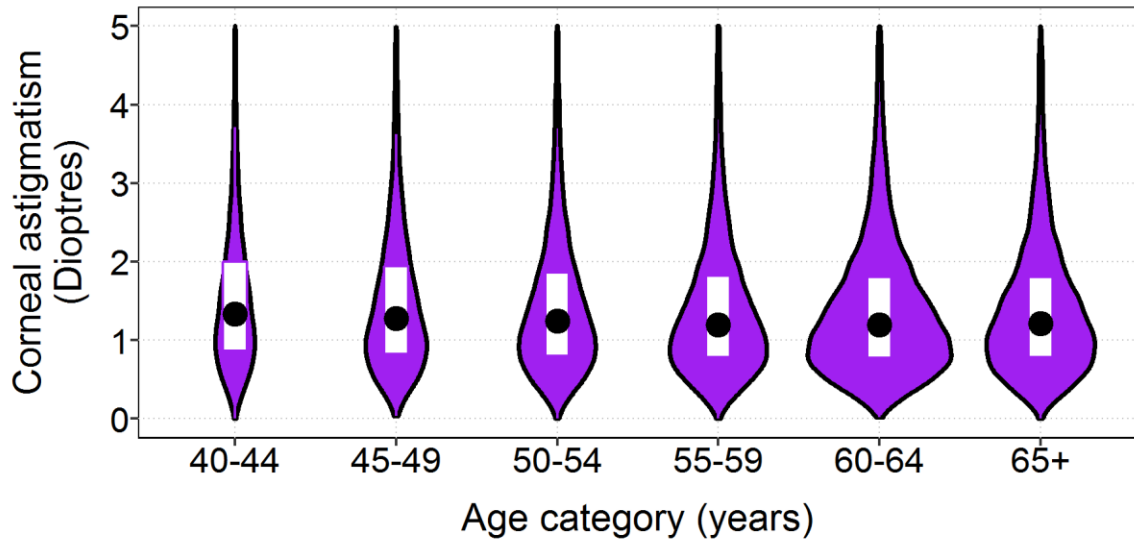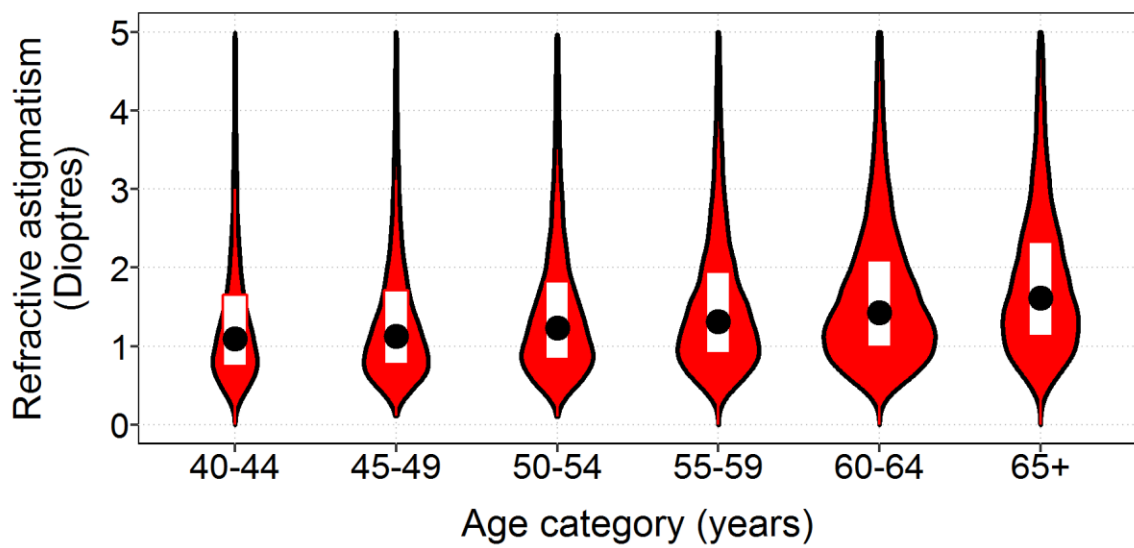

**Online Resource 2. Estimates of SNP-heritability ( $h^2_{\text{SNP}}$ ) for corneal astigmatism, refractive astigmatism and spherical equivalent.** Analyses were conducted using GCTA-GREML.  $h^2_{\text{SNP}}$  = SNP-heritability; SE = standard error; P-value = test of the null hypothesis ( $h^2_{\text{SNP}} = 0$ ).

| Trait                                          | Case Threshold (D) | Case Prevalence |        | $h^2_{\text{SNP}}$ | SE    | P-value                |
|------------------------------------------------|--------------------|-----------------|--------|--------------------|-------|------------------------|
|                                                |                    | Population      | Sample |                    |       |                        |
| <b>Corneal Astigmatism<br/>(N = 27,707)</b>    | Continuous         | -               | -      | 0.061              | 0.021 | $1.19 \times 10^{-3}$  |
|                                                | 0.50               | 0.72            | 0.70   | 0.094              | 0.036 | $3.53 \times 10^{-3}$  |
|                                                | 0.75               | 0.46            | 0.45   | 0.053              | 0.033 | 0.051                  |
|                                                | 1.00               | 0.28            | 0.27   | 0.086              | 0.038 | $9.86 \times 10^{-3}$  |
|                                                | 1.25               | 0.17            | 0.17   | 0.042              | 0.046 | 0.175                  |
|                                                | 1.50               | 0.11            | 0.10   | 0.000              | 0.057 | 0.500                  |
| <b>Refractive Astigmatism<br/>(N = 28,378)</b> | Continuous         | -               | -      | 0.046              | 0.020 | $7.74 \times 10^{-3}$  |
|                                                | 0.50               | 0.73            | 0.71   | 0.015              | 0.035 | 0.332                  |
|                                                | 0.75               | 0.47            | 0.45   | 0.091              | 0.032 | $2.00 \times 10^{-3}$  |
|                                                | 1.00               | 0.30            | 0.28   | 0.105              | 0.036 | $1.45 \times 10^{-3}$  |
|                                                | 1.25               | 0.19            | 0.18   | 0.158              | 0.045 | $1.24 \times 10^{-4}$  |
|                                                | 1.50               | 0.12            | 0.11   | 0.057              | 0.055 | 0.143                  |
| <b>Spherical Equivalent<br/>(N = 28,378)</b>   | Continuous         | -               | -      | 0.387              | 0.022 | $5.05 \times 10^{-85}$ |
|                                                | -0.50              | 0.35            | 0.33   | 0.462              | 0.036 | $2.61 \times 10^{-43}$ |
|                                                | -0.75              | 0.30            | 0.29   | 0.469              | 0.038 | $1.74 \times 10^{-41}$ |
|                                                | -1.00              | 0.27            | 0.27   | 0.491              | 0.039 | $7.04 \times 10^{-42}$ |
|                                                | -1.25              | 0.25            | 0.24   | 0.463              | 0.040 | $1.30 \times 10^{-34}$ |
|                                                | -1.50              | 0.23            | 0.22   | 0.476              | 0.042 | $2.20 \times 10^{-33}$ |

**Online Resource 3. Partitioning trait variance into additive, dominance and environmental components using GREMLd**

| Trait                  | Sample Size | Additive | 95% CI      | Dominance | 95% CI      | Environment |
|------------------------|-------------|----------|-------------|-----------|-------------|-------------|
| Corneal Astigmatism    | 27,714      | 0.056    | 0.015-0.096 | 0.000     | 0.000-0.036 | 0.944       |
| Refractive Astigmatism | 28,378      | 0.046    | 0.007-0.085 | 0.000     | 0.000-0.035 | 0.954       |
| Spherical Equivalent   | 28,378      | 0.368    | 0.326-0.411 | 0.000     | 0.000-0.033 | 0.632       |

**Online Resource 4. Summary of GWAS undertaken.**  $\lambda_{GC}$  = genomic inflation factor;  $\lambda_{LDSC}$  = intercept from LD Score regression. The number of independent loci was identified using GCTA-COJO.

| Trait                  |                    | Method    | No. of Markers | Sample Size | $\lambda_{GC}$ | $\lambda_{LDSC}$ | No. of Genome-wide Significant Markers ( $P < 5 \times 10^{-8}$ ) | No. of Independent Genome-wide Significant Loci |
|------------------------|--------------------|-----------|----------------|-------------|----------------|------------------|-------------------------------------------------------------------|-------------------------------------------------|
| Corneal Astigmatism    | Continuous         | BOLT-LMM  | 5,901,671      | 86,335      | 1.094          | 1.023            | 89                                                                | 4                                               |
|                        | Continuous         | PLINK 2.0 | 5,921,785      | 69,140      | 1.057          | 1.020            | 54                                                                | 4                                               |
|                        | Cases $\geq 1.00D$ | PLINK 2.0 | 5,921,785      | 69,140      | 1.030          | 1.001            | 49                                                                | 3                                               |
| Refractive Astigmatism | Continuous         | BOLT-LMM  | 5,900,115      | 88,005      | 1.045          | 1.005            | 45                                                                | 4                                               |
|                        | Continuous         | PLINK 2.0 | 5,919,636      | 70,505      | 1.042          | 1.003            | 13                                                                | 2                                               |
|                        | Cases $\geq 1.00D$ | PLINK 2.0 | 5,919,636      | 70,505      | 1.016          | 0.997            | 1                                                                 | 1                                               |

**Online Resource 5. Conditional analyses performed using summary statistics and conditioning on lead marker – for genome-wide significant associated loci from Corneal Astigmatism GWAS.** GCTA-COJO Lead Variant: lead variant within  $\pm 1$  Mb of *GWAS Lead Marker* location

| Chromosome | GWAS Lead Marker | P-value                | GCTA-COJO Lead Marker   | P-value               |
|------------|------------------|------------------------|-------------------------|-----------------------|
| 1          | rs12032649       | $5.00 \times 10^{-14}$ | NA (co-linearity error) | NA                    |
| 6          | rs196052         | $7.80 \times 10^{-11}$ | rs114074527             | $1.84 \times 10^{-4}$ |
| 15         | rs1129038        | $1.10 \times 10^{-15}$ | rs1800407               | $9.88 \times 10^{-6}$ |
| 17         | rs62075722       | $2.20 \times 10^{-13}$ | rs113458760             | $3.23 \times 10^{-4}$ |

**Online Resource 6. Conditional analyses performed using summary statistics and conditioning on lead marker – for genome-wide significant associated loci from Refractive Astigmatism GWAS.** GCTA-COJO Lead Variant: lead variant within  $\pm 1$  Mb of *GWAS Lead Marker* location.

| Chromosome | GWAS Lead Marker | P-value                | GCTA-COJO Lead Marker | P-value                |
|------------|------------------|------------------------|-----------------------|------------------------|
| 6          | rs12196123       | $1.60 \times 10^{-15}$ | rs148281502           | $2.29 \times 10^{-4}$  |
| 15         | rs1129038        | $2.30 \times 10^{-11}$ | rs1800407             | $9.03 \times 10^{-15}$ |
| 17         | rs34635363       | $2.00 \times 10^{-9}$  | rs75248478            | $9.17 \times 10^{-4}$  |

**Online Resource 7. The 10 markers demonstrating strongest association in GWAS for Corneal Astigmatism analysed as a continuous trait with PLINK 2.0.**

NB: markers within ±500 kb of listed (lead) marker are not included in this list.

| Marker      | Chromosome | Position  | Effect Allele | Reference Allele | Effect (SE)    | P-value                  | Nearest Gene        |
|-------------|------------|-----------|---------------|------------------|----------------|--------------------------|---------------------|
| rs1129038   | 15         | 28356859  | T             | C                | 0.026 (0.004)  | 5.73 x 10 <sup>-12</sup> | <i>HERC2</i>        |
| rs12032649  | 1          | 219778959 | G             | T                | 0.021 (0.003)  | 6.60 x 10 <sup>-11</sup> | <i>ZC3H11B</i>      |
| rs34635363  | 17         | 79549250  | A             | G                | -0.021 (0.003) | 7.09 x 10 <sup>-11</sup> | <i>NPLOC4</i>       |
| rs196052    | 6          | 22057200  | A             | T                | -0.018 (0.003) | 3.53 x 10 <sup>-8</sup>  | <i>LINC00340</i>    |
| rs138016380 | 10         | 34449466  | A             | C                | 0.050 (0.010)  | 1.40 x 10 <sup>-6</sup>  | <i>PARD3</i>        |
| rs142566675 | 3          | 35248521  | A             | C                | 0.077 (0.016)  | 1.51 x 10 <sup>-6</sup>  | <i>LOC101928135</i> |
| rs75380963  | 3          | 181554299 | T             | C                | 0.079 (0.017)  | 2.29 x 10 <sup>-6</sup>  | <i>LOC101929598</i> |
| rs115822495 | 6          | 15681708  | T             | C                | -0.072 (0.015) | 2.94 x 10 <sup>-6</sup>  | <i>DTNBP1</i>       |
| rs11955682  | 5          | 11416298  | T             | G                | 0.047 (0.010)  | 3.15 x 10 <sup>-6</sup>  | <i>CTNND2</i>       |
| rs11639295  | 15         | 67460757  | T             | C                | -0.016 (0.003) | 3.24 x 10 <sup>-6</sup>  | <i>SMAD3</i>        |

**Online Resource 8. The 10 markers demonstrating strongest association in GWAS for Corneal Astigmatism analysed as a dichotomous trait (cases**

**≥1.00D) with PLINK 2.0.** NB: markers within ±500 kb of listed (lead) marker are not included in this list.

| Marker      | Chromosome | Position  | Effect Allele | Reference Allele | Odds Ratio (95% CI) | P-value                  | Nearest Gene     |
|-------------|------------|-----------|---------------|------------------|---------------------|--------------------------|------------------|
| rs72629670  | 1          | 219768131 | G             | A                | 0.925 (0.901-0.950) | 3.95 x 10 <sup>-10</sup> | <i>ZC3H11B</i>   |
| rs62075722  | 17         | 79611271  | G             | A                | 1.075 (1.051-1.100) | 8.14 x 10 <sup>-9</sup>  | <i>TSPAN10</i>   |
| rs12913832  | 15         | 28365618  | G             | A                | 0.920 (0.891-0.950) | 2.96 x 10 <sup>-8</sup>  | <i>HERC2</i>     |
| rs11238956  | 10         | 44749854  | C             | T                | 0.937 (0.912-0.962) | 2.89 x 10 <sup>-7</sup>  | <i>C10orf142</i> |
| rs1623169   | 11         | 128584320 | T             | C                | 1.088 (1.056-1.121) | 3.80 x 10 <sup>-7</sup>  | <i>FLI1</i>      |
| rs6434068   | 2          | 153357541 | C             | G                | 1.063 (1.039-1.088) | 6.18 x 10 <sup>-7</sup>  | <i>FMNL2</i>     |
| rs11639295  | 15         | 67460757  | T             | C                | 1.069 (1.042-1.095) | 8.57 x 10 <sup>-7</sup>  | <i>SMAD3</i>     |
| rs2763272   | 6          | 168832091 | T             | C                | 0.932 (0.904-0.960) | 1.19 x 10 <sup>-6</sup>  | <i>SMOC2</i>     |
| rs115822495 | 6          | 15681708  | T             | C                | 1.343 (1.219-1.468) | 3.57 x 10 <sup>-6</sup>  | <i>DTNBP1</i>    |
| rs10223780  | 6          | 62865025  | G             | C                | 1.059 (1.035-1.083) | 3.90 x 10 <sup>-6</sup>  | <i>KHDRBS2</i>   |

**Online Resource 9. The 10 markers demonstrating strongest association in GWAS for Refractive Astigmatism analysed as a continuous trait with PLINK 2.0.** NB: markers within  $\pm 500$  kb of listed (lead) marker are not included in this list.

| Marker      | Chromosome | Position  | Effect Allele | Reference Allele | Effect (SE)    | P-value                | Nearest Gene        |
|-------------|------------|-----------|---------------|------------------|----------------|------------------------|---------------------|
| rs12196123  | 6          | 22082263  | T             | C                | -0.022 (0.003) | $1.07 \times 10^{-11}$ | <i>LINC00340</i>    |
| rs1129038   | 15         | 28356859  | T             | C                | -0.024 (0.004) | $3.63 \times 10^{-10}$ | <i>HERC2</i>        |
| rs10177414  | 2          | 228211470 | C             | T                | -0.018 (0.003) | $5.95 \times 10^{-8}$  | <i>MFF</i>          |
| rs34635363  | 17         | 79549250  | A             | G                | -0.018 (0.003) | $1.75 \times 10^{-7}$  | <i>NPLOC4</i>       |
| rs11244084  | 9          | 136191010 | T             | C                | 0.032 (0.006)  | $1.78 \times 10^{-7}$  | <i>LCN1P2</i>       |
| rs139743    | 22         | 25299429  | G             | A                | -0.017 (0.003) | $2.03 \times 10^{-7}$  | <i>SGSM1</i>        |
| rs116771750 | 1          | 219699050 | C             | T                | -0.046 (0.009) | $2.11 \times 10^{-7}$  | <i>ZC3H11B</i>      |
| rs2072970   | 20         | 40112488  | A             | G                | -0.017 (0.003) | $7.93 \times 10^{-7}$  | <i>CHD6</i>         |
| rs55939894  | 3          | 7963288   | G             | A                | -0.020 (0.004) | $9.09 \times 10^{-7}$  | <i>LOC101927394</i> |
| rs17172445  | 7          | 55189215  | T             | G                | -0.049 (0.010) | $9.43 \times 10^{-7}$  | <i>EGFR</i>         |

**Online Resource 10. The 10 markers demonstrating strongest association in GWAS for Refractive Astigmatism analysed as a dichotomous trait (cases  $\geq 1.00D$ ) with PLINK 2.0.** NB: markers within  $\pm 500$  kb of listed (lead) marker are not included in this list.

| Marker      | Chromosome | Position  | Effect Allele | Reference Allele | Odds Ratio (95% CI) | P-value               | Nearest Gene        |
|-------------|------------|-----------|---------------|------------------|---------------------|-----------------------|---------------------|
| rs10946507  | 6          | 22100367  | A             | G                | 0.930 (0.906-0.954) | $2.15 \times 10^{-9}$ | <i>LINC00340</i>    |
| rs10177414  | 2          | 228211470 | C             | T                | 0.942 (0.918-0.966) | $1.34 \times 10^{-6}$ | <i>MFF</i>          |
| rs11244084  | 9          | 136191010 | T             | C                | 0.898 (0.853-0.942) | $2.07 \times 10^{-6}$ | <i>LCN1P2</i>       |
| rs73430835  | 7          | 111628421 | C             | T                | 0.777 (0.673-0.882) | $2.19 \times 10^{-6}$ | <i>DOCK4</i>        |
| rs2026781   | 10         | 133841039 | C             | G                | 1.067 (1.040-1.094) | $2.62 \times 10^{-6}$ | <i>JAKMIP3</i>      |
| rs114330092 | 5          | 178661923 | T             | G                | 0.866 (0.807-0.926) | $2.81 \times 10^{-6}$ | <i>ADAMTS2</i>      |
| rs12051285  | 16         | 7460115   | G             | T                | 1.057 (1.034-1.081) | $4.61 \times 10^{-6}$ | <i>RBFOX1</i>       |
| rs192526513 | 7          | 44989410  | A             | G                | 1.245 (1.150-1.340) | $5.54 \times 10^{-6}$ | <i>MYO1G</i>        |
| rs151198248 | 20         | 42389025  | T             | C                | 1.335 (1.210-1.460) | $6.19 \times 10^{-6}$ | <i>LOC101927200</i> |
| rs76638496  | 8          | 82917849  | A             | G                | 0.829 (0.748-0.911) | $6.39 \times 10^{-6}$ | <i>SNX16</i>        |

**Online Resource 11. Manhattan plots for GWAS of Corneal and Refractive Astigmatism using PLINK 2.0 as continuous and dichotomous (cases  $\geq 1.00D$ ) traits. A: Corneal Astigmatism (continuous trait); B: Corneal Astigmatism (dichotomous trait); C: Refractive Astigmatism (continuous trait); D: Refractive Astigmatism (dichotomous trait). All panels: Red line indicates  $P = 5 \times 10^{-8}$ ; blue line indicates  $P = 1 \times 10^{-5}$ .**

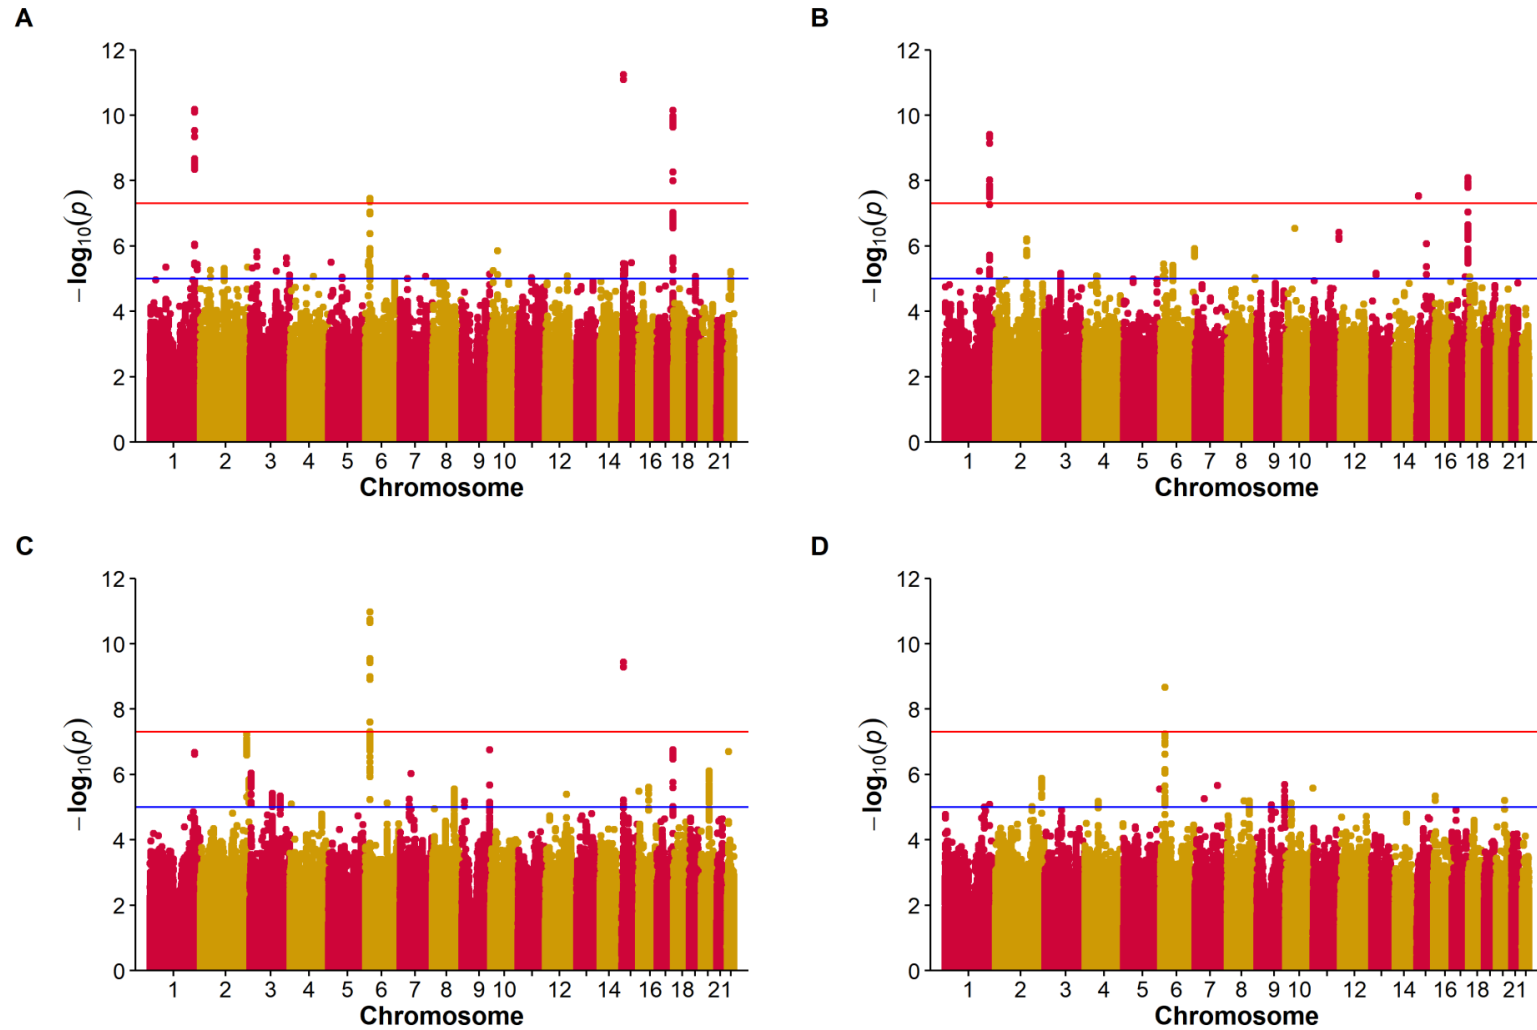



**Online Resource 12. Quantile-Quantile plots from GWAS of Corneal and Refractive Astigmatism using PLINK 2.0 as continuous and dichotomous (cases  $\geq 1.00D$ ) traits. A: Corneal Astigmatism (continuous trait); B: Corneal Astigmatism (dichotomous trait); C: Refractive Astigmatism (continuous trait); D: Refractive Astigmatism (dichotomous trait). All panels: Y-axis shows observed negative  $\log_{10}$  p-values and X-axis shows expected negative  $\log_{10}$  p-values according to the null hypothesis of no genetic association. Red line: line of unity (observed = expected).**

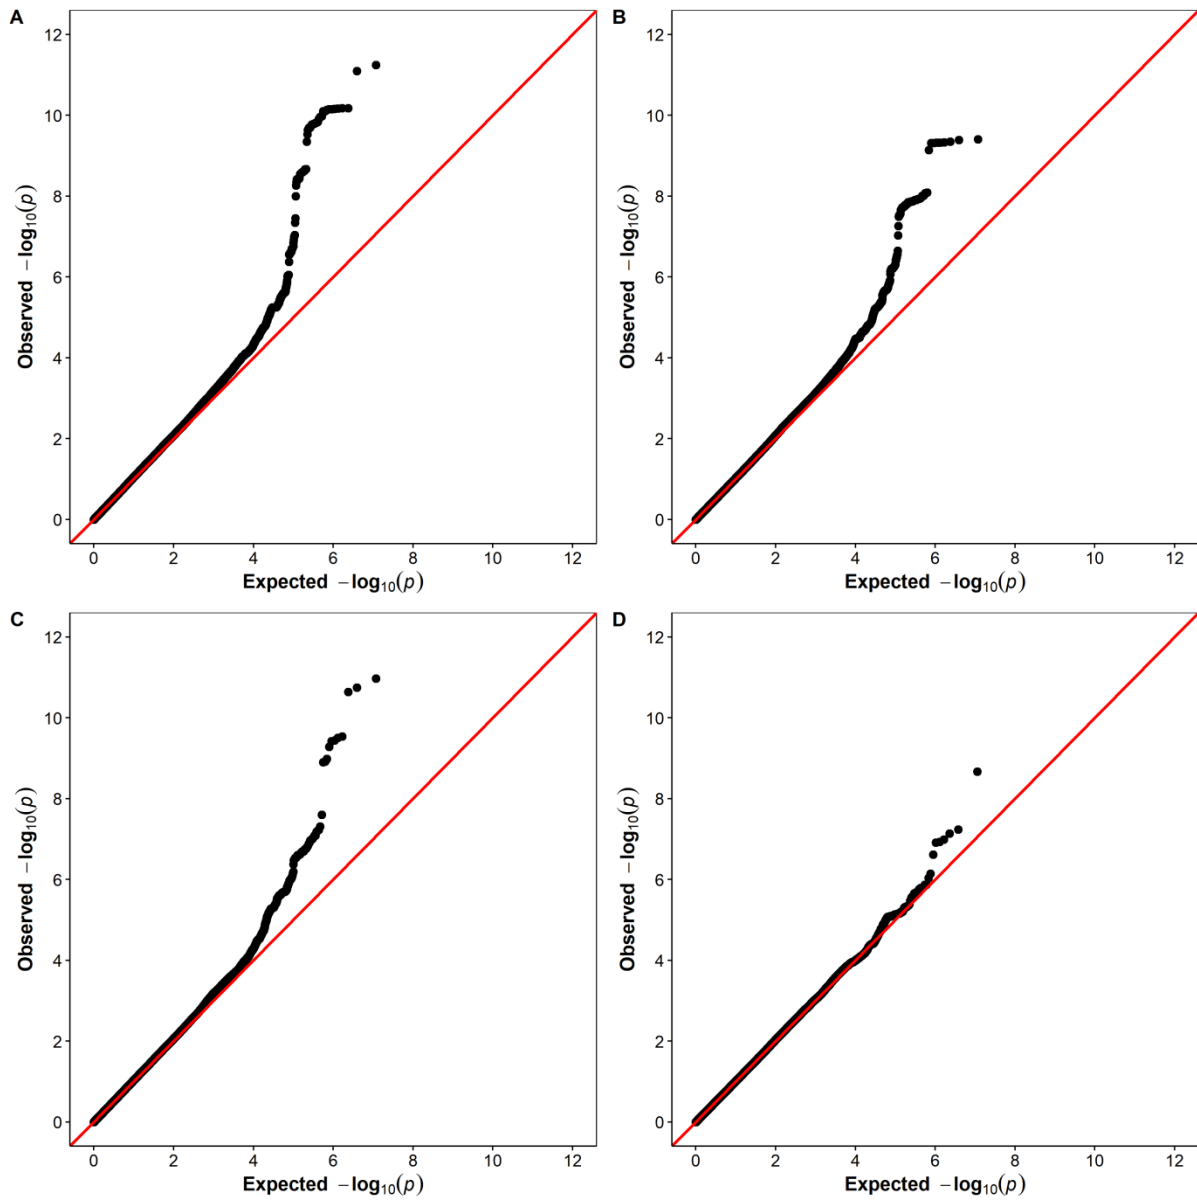

**Online Resource 13. Tests for a difference in genetic effect size in male vs. female participants for the genome-wide significant loci for corneal astigmatism analysed as a continuous trait in unrelated participants.** Age, spherical equivalent refractive error, and a binary indicator for genotyping array were included as covariates.

| Marker     | Effect Allele | Female participants (n=37,377) |          | Male participants (n=31,763) |          | Difference in effect size in females vs. males P-value | Nearest Gene     |
|------------|---------------|--------------------------------|----------|------------------------------|----------|--------------------------------------------------------|------------------|
|            |               | Beta (SE) in Dioptres          | P-value  | Beta (SE) in Dioptres        | P-value  |                                                        |                  |
| rs1129038  | C             | -0.034 (0.005)                 | 3.59E-11 | -0.017 (0.006)               | 3.03E-03 | 0.024                                                  | <i>HERC2</i>     |
| rs12032649 | T             | -0.026 (0.004)                 | 5.84E-09 | -0.017 (0.005)               | 6.22E-04 | 0.167                                                  | <i>ZC3H11B</i>   |
| rs62075722 | A             | 0.023 (0.004)                  | 2.03E-07 | 0.018 (0.005)                | 1.59E-04 | 0.479                                                  | <i>TSPAN10</i>   |
| rs196052   | T             | 0.019 (0.004)                  | 1.06E-05 | 0.017 (0.005)                | 5.42E-04 | 0.682                                                  | <i>LINC00340</i> |

**Online Resource 14. Tests for a difference in genetic effect size in male vs. female participants for the genome-wide significant loci for refractive astigmatism analysed as a continuous trait in unrelated participants.** Age, spherical equivalent refractive error, and a binary indicator for genotyping array were included as covariates.

| Marker     | Effect Allele | Female participants (n=37,379) |          | Male participants (n=33,126) |          | Difference in effect size in females vs. males P-value | Nearest Gene     |
|------------|---------------|--------------------------------|----------|------------------------------|----------|--------------------------------------------------------|------------------|
|            |               | Beta (SE) in Dioptres          | P-value  | Beta (SE) in Dioptres        | P-value  |                                                        |                  |
| rs12196123 | C             | -0.017 (0.004)                 | 5.26E-05 | -0.028 (0.005)               | 2.37E-08 | 0.121                                                  | <i>LINC00340</i> |
| rs1129038  | C             | -0.027 (0.005)                 | 1.49E-07 | -0.021 (0.006)               | 3.46E-04 | 0.456                                                  | <i>HERC2</i>     |
| rs34635363 | A             | 0.016 (0.004)                  | 4.10E-04 | 0.020 (0.005)                | 9.63E-05 | 0.533                                                  | <i>NPLOC4</i>    |

**Online Resource 15. The 10 genes demonstrating strongest association from the MAGMA gene-based association test for Corneal Astigmatism as a continuous trait.** Start and stop positions listed include  $\pm 50$  kb flanking regions; nSNPs = number of variants included in gene region; Z-Statistic = gene-based test statistic; P-value = obtained from Z-Statistic under the assumption of a normally distributed model; FDR = false discovery rate.

| Gene            | Chromosome | Start    | Stop     | nSNPs | Z Statistic | P-value                | FDR                   | Bonferroni Adjusted P |
|-----------------|------------|----------|----------|-------|-------------|------------------------|-----------------------|-----------------------|
| <i>NPLOC4</i>   | 17         | 79473913 | 79654138 | 716   | 6.34        | $1.15 \times 10^{-10}$ | $2.10 \times 10^{-6}$ | $2.10 \times 10^{-6}$ |
| <i>TSPAN10</i>  | 17         | 79559349 | 79665779 | 485   | 5.71        | $5.75 \times 10^{-9}$  | $5.27 \times 10^{-5}$ | $1.05 \times 10^{-4}$ |
| <i>PDE6G</i>    | 17         | 79567489 | 79673607 | 479   | 5.46        | $2.36 \times 10^{-8}$  | $1.44 \times 10^{-6}$ | $4.33 \times 10^{-4}$ |
| <i>HERC2</i>    | 15         | 28306183 | 28617313 | 185   | 5.33        | $5.01 \times 10^{-8}$  | $2.30 \times 10^{-4}$ | $9.19 \times 10^{-4}$ |
| <i>CCDC137</i>  | 17         | 79583761 | 79690937 | 470   | 5.24        | $7.88 \times 10^{-8}$  | $2.89 \times 10^{-4}$ | $1.45 \times 10^{-3}$ |
| <i>OXLD1</i>    | 17         | 79582066 | 79683618 | 476   | 5.16        | $1.24 \times 10^{-7}$  | $3.78 \times 10^{-4}$ | $2.27 \times 10^{-3}$ |
| <i>PDGFRA</i>   | 4          | 55045264 | 55214412 | 324   | 5.07        | $1.99 \times 10^{-7}$  | $5.21 \times 10^{-4}$ | $3.65 \times 10^{-3}$ |
| <i>C17orf70</i> | 17         | 79456911 | 79569429 | 402   | 4.93        | $4.08 \times 10^{-7}$  | $9.34 \times 10^{-4}$ | $7.47 \times 10^{-3}$ |
| <i>HGS</i>      | 17         | 79600962 | 79719151 | 423   | 4.82        | $7.24 \times 10^{-7}$  | $1.48 \times 10^{-3}$ | 0.013                 |
| <i>ARL16</i>    | 17         | 79598224 | 79700954 | 437   | 4.68        | $1.47 \times 10^{-6}$  | $2.69 \times 10^{-3}$ | 0.027                 |

**Online Resource 16. The 10 genes demonstrating strongest association from the MAGMA gene-based association test for Refractive Astigmatism as a continuous trait.** Start and stop positions listed include  $\pm 50$  kb flanking regions; nSNPs = number of variants included in gene region; Z-Statistic = gene-based test statistic; P-value = obtained from Z-Statistic under the assumption of a normally distributed model; FDR = false discovery rate.

| Gene           | Chromosome | Start     | Stop      | nSNPs | Z Statistic | P-value               | FDR                   | Bonferroni Adjusted P |
|----------------|------------|-----------|-----------|-------|-------------|-----------------------|-----------------------|-----------------------|
| <i>TMEM211</i> | 22         | 25281208  | 25385314  | 144   | 4.90        | $4.72 \times 10^{-7}$ | $4.96 \times 10^{-3}$ | $8.65 \times 10^{-3}$ |
| <i>PROX1</i>   | 1          | 214111278 | 214264853 | 278   | 4.88        | $5.41 \times 10^{-7}$ | $4.96 \times 10^{-3}$ | $9.92 \times 10^{-3}$ |
| <i>HERC2</i>   | 15         | 28306183  | 28617313  | 186   | 4.76        | $9.86 \times 10^{-7}$ | $5.00 \times 10^{-3}$ | 0.018                 |
| <i>TSPAN10</i> | 17         | 79559349  | 79665779  | 484   | 4.74        | $1.09 \times 10^{-6}$ | $5.00 \times 10^{-3}$ | 0.020                 |
| <i>NPLOC4</i>  | 17         | 79473913  | 79654138  | 717   | 4.60        | $2.15 \times 10^{-6}$ | $5.69 \times 10^{-3}$ | 0.039                 |
| <i>PDE6G</i>   | 17         | 79567489  | 79673607  | 478   | 4.60        | $2.15 \times 10^{-6}$ | $5.69 \times 10^{-3}$ | 0.039                 |
| <i>PLAUR</i>   | 19         | 44100247  | 44224498  | 254   | 4.59        | $2.17 \times 10^{-6}$ | $5.69 \times 10^{-3}$ | 0.040                 |
| <i>OXL1</i>    | 17         | 79582066  | 79683618  | 475   | 4.38        | $5.87 \times 10^{-6}$ | 0.013                 | 0.108                 |
| <i>CCDC137</i> | 17         | 79583761  | 79690937  | 469   | 4.35        | $6.71 \times 10^{-6}$ | 0.014                 | 0.123                 |
| <i>VAX2</i>    | 2          | 71077720  | 71210576  | 281   | 4.33        | $7.59 \times 10^{-6}$ | 0.014                 | 0.139                 |
